# Supplementary material for: The Management of Irrigation and Potassium Fertilization to Mitigate the Effect of Light Frosts on the Phenolic and Volatile Compounds in Virgin Olive Oils
Source: MDPI journal article supplement (doi:10.3390/antiox13050559), 2024-05-01
Supplement: s1 [file s1]

| Primary ID | Trait     | Date | K Fertilization | Irrigation | Free Acidity | Peroxide value | K232    | K270      | Y2      | Δ*       | Δ*      | Δ*      | ORAC    | Tocopherol | Ellenoic acid | Hydroxyprosol | Tyrosol  | Vanillic acid | Syringic acid | Vanillin | roxyprosol+acetic+coumaric+ac | Ferulic acid | Tyrosol+acetic+4-OHPEA+EDAA+3,4-OHPEA+DHPA+EDA | 4-HPEA+EDA | dHPA+EDA | Phenoreinol | +HPEA+EDA+DU | ANDA     | Luteolin | Apigenin | Methyl-tyrosol+Phenolic comp. | Secoiridoids | Ethanol  | thyl     | Propenol | Pentanol | ethylphenyl-2- |           |          |           |
|------------|-----------|------|-----------------|------------|--------------|----------------|---------|-----------|---------|----------|---------|---------|---------|------------|---------------|---------------|----------|---------------|---------------|----------|-------------------------------|--------------|------------------------------------------------|------------|----------|-------------|--------------|----------|----------|----------|-------------------------------|--------------|----------|----------|----------|----------|----------------|-----------|----------|-----------|
| 1          | Freeze On | May  | 100             | 5202       | 0.17923      | 2.61819        | 2.11534 | 0.091891  | 95.2    | -2.865   | 38.75   | 2.8094  | 148.179 | 65.3641    | 63.4448       | 11.7511       | 0.175783 | 0.088803      | 0.12647       | 1.2108   | 0.48825                       | 0.53301      | 0.090604                                       | 8.78017    | 0.151044 | 0.62614     | 15.0887      | 2.0027   | 26.4071  | 4.44343  | 3.03036                       | 2.88733      | 1.13974  | 1.06663  | 136.215  | 32.4771  | 0.474597       | 0.047009  | 0.307173 | 0.126104  |
| 2          | Freeze On | May  | 100             | 5202       | 0.179661     | 1.51923        | 1.88169 | 0.077262  | 98.135  | -7.1     | 36.43   | 1.6076  | 140.621 | 65.3641    | 63.4448       | 11.7511       | 0.175783 | 0.088803      | 0.12647       | 1.2108   | 0.48825                       | 0.53301      | 0.090604                                       | 8.78017    | 0.151044 | 0.62614     | 15.0887      | 2.0027   | 26.4071  | 4.44343  | 3.03036                       | 2.88733      | 1.13974  | 1.06663  | 136.215  | 32.4771  | 0.474597       | 0.047009  | 0.307173 | 0.126104  |
| 3          | Freeze On | May  | 100             | 5202       | 0.133094     | 1.38778        | 1.98688 | 0.078936  | 100.205 | -9.005   | 32.21   | 1.5744  | 150.933 | 65.3641    | 63.4448       | 11.7511       | 0.175783 | 0.088803      | 0.12647       | 1.2108   | 0.48825                       | 0.53301      | 0.090604                                       | 8.78017    | 0.151044 | 0.62614     | 15.0887      | 2.0027   | 26.4071  | 4.44343  | 3.03036                       | 2.88733      | 1.13974  | 1.06663  | 136.215  | 32.4771  | 0.474597       | 0.047009  | 0.307173 | 0.126104  |
| 4          | Freeze On | May  | 100             | 5202       | 0.175483     | 1.46488        | 1.89582 | 0.079438  | 99.875  | -13.725  | 46.74   | 7.43256 | 183.558 | 65.3641    | 63.4448       | 11.7511       | 0.175783 | 0.088803      | 0.12647       | 1.2108   | 0.48825                       | 0.53301      | 0.090604                                       | 8.78017    | 0.151044 | 0.62614     | 15.0887      | 2.0027   | 26.4071  | 4.44343  | 3.03036                       | 2.88733      | 1.13974  | 1.06663  | 136.215  | 32.4771  | 0.474597       | 0.047009  | 0.307173 | 0.126104  |
| 5          | Freeze On | May  | 175             | 5202       | 0.155604     | 1.85659        | 1.60473 | 0.081735  | 100     | -11.4    | 35.1    | 1.8207  | 149.678 | 65.3641    | 63.4448       | 11.7511       | 0.175783 | 0.088803      | 0.12647       | 1.2108   | 0.48825                       | 0.53301      | 0.090604                                       | 8.78017    | 0.151044 | 0.62614     | 15.0887      | 2.0027   | 26.4071  | 4.44343  | 3.03036                       | 2.88733      | 1.13974  | 1.06663  | 136.215  | 32.4771  | 0.474597       | 0.047009  | 0.307173 | 0.126104  |
| 6          | Freeze On | May  | 175             | 5202       | 0.128431     | 1.84768        | 1.9538  | 0.091343  | 100.81  | -5.02    | 53.24   | 7.43256 | 199.872 | 66.5626    | 64.4649       | 0.19394       | 0.170292 | 0.105079      | 0.17926       | 0.74688  | 0.38349                       | 0.48466      | 0.089342                                       | 4.46787    | 0.239045 | 0.609967    | 15.8387      | 2.47209  | 24.0992  | 3.90926  | 2.94506                       | 0.509007     | 0.509007 | 0.892723 | 121.502  | 27.0038  | 0.474597       | 0.047009  | 0.307173 | 0.126104  |
| 7          | Freeze On | May  | 175             | 5202       | 0.142518     | 1.85219        | 1.89399 | 0.089039  | 100.305 | -13.35   | 46.36   | 3.2802  | 177.048 | 66.5626    | 64.4649       | 0.19394       | 0.170292 | 0.105079      | 0.17926       | 0.74688  | 0.38349                       | 0.48466      | 0.089342                                       | 4.46787    | 0.239045 | 0.609967    | 15.8387      | 2.47209  | 24.0992  | 3.90926  | 2.94506                       | 0.509007     | 0.509007 | 0.892723 | 121.502  | 27.0038  | 0.474597       | 0.047009  | 0.307173 | 0.126104  |
| 8          | Freeze On | May  | 175             | 5202       | 0.140684     | 1.87608        | 1.90586 | 0.089726  | 100.114 | -11.487  | 36.31   | 2.8037  | 180.908 | 66.5626    | 64.4649       | 0.19394       | 0.170292 | 0.105079      | 0.17926       | 0.74688  | 0.38349                       | 0.48466      | 0.089342                                       | 4.46787    | 0.239045 | 0.609967    | 15.8387      | 2.47209  | 24.0992  | 3.90926  | 2.94506                       | 0.509007     | 0.509007 | 0.892723 | 121.502  | 27.0038  | 0.474597       | 0.047009  | 0.307173 | 0.126104  |
| 9          | Freeze On | May  | 175             | 5202       | 0.140836     | 1.74666        | 1.80486 | 0.087786  | 100.58  | -13.35   | 46.36   | 1.5744  | 171.781 | 66.5626    | 64.4649       | 0.19394       | 0.170292 | 0.105079      | 0.17926       | 0.74688  | 0.38349                       | 0.48466      | 0.089342                                       | 4.46787    | 0.239045 | 0.609967    | 15.8387      | 2.47209  | 24.0992  | 3.90926  | 2.94506                       | 0.509007     | 0.509007 | 0.892723 | 121.502  | 27.0038  | 0.474597       | 0.047009  | 0.307173 | 0.126104  |
| 10         | Freeze On | May  | 175             | 5202       | 0.148229     | 1.5041         | 1.81621 | 0.072809  | 101.645 | -10.34   | 33.185  | 2.71082 | 146.465 | 67.7205    | 70.1781       | 1.58209       | 0.150263 | 0.072132      | 0.129674      | 2.55627  | 0.137483                      | 0.188951     | 0.127635                                       | 34.4082    | 1.62601  | 0.048649    | 30.383       | 0.709113 | 25.8048  | 4.13238  | 1.77832                       | 3.8392       | 1.33811  | 1.18027  | 204.968  | 86.7478  | 0.666664       | 0.074632  | 0.206645 | 0.102407  |
| 11         | Freeze On | May  | 175             | 5202       | 0.147439     | 1.49688        | 1.78784 | 0.071723  | 101.13  | -10.5875 | 34.75   | 7.10382 | 149.266 | 67.7205    | 70.1781       | 1.58209       | 0.150263 | 0.072132      | 0.129674      | 2.55627  | 0.137483                      | 0.188951     | 0.127635                                       | 34.4082    | 1.62601  | 0.048649    | 30.383       | 0.709113 | 25.8048  | 4.13238  | 1.77832                       | 3.8392       | 1.33811  | 1.18027  | 204.968  | 86.7478  | 0.666664       | 0.074632  | 0.206645 | 0.102407  |
| 12         | Freeze On | May  | 175             | 5202       | 0.147684     | 1.59151        | 1.67479 | 0.071821  | 100.88  | -11.487  | 36.31   | 1.8207  | 149.678 | 65.3641    | 63.4448       | 11.7511       | 0.175783 | 0.088803      | 0.12647       | 1.2108   | 0.48825                       | 0.53301      | 0.090604                                       | 8.78017    | 0.151044 | 0.62614     | 15.0887      | 2.0027   | 26.4071  | 4.44343  | 3.03036                       | 2.88733      | 1.13974  | 1.06663  | 136.215  | 32.4771  | 0.474597       | 0.047009  | 0.307173 | 0.126104  |
| 13         | Freeze On | May  | 250             | 5202       | 0.179403     | 4.7078         | 2.43196 | 0.072782  | 88.715  | -7.805   | 39.995  | 2.65989 | 127.533 | 17.0561    | 0.626867      | 1.80384       | 0.642796 | 0.0048092     | 0.132887      | 1.19002  | 0.726349                      | 0.177048     | 0.13337                                        | 5.51072    | 0.103122 | 0.681932    | 11.3456      | 1.13069  | 24.8825  | 4.13044  | 2.82095                       | 2.14555      | 0.99068  | 0.04107  | 76.0103  | 24.7119  | 1.0579         | 0.078213  | 0.464305 | 0.177782  |
| 14         | Freeze On | May  | 250             | 5202       | 0.179308     | 0.856373       | 1.94147 | 0.077288  | 100.125 | -10.165  | 34.665  | 1.51748 | 167.133 | 17.0561    | 0.626867      | 1.80384       | 0.642796 | 0.0048092     | 0.132887      | 1.19002  | 0.726349                      | 0.177048     | 0.13337                                        | 5.51072    | 0.103122 | 0.681932    | 11.3456      | 1.13069  | 24.8825  | 4.13044  | 2.82095                       | 2.14555      | 0.99068  | 0.04107  | 76.0103  | 24.7119  | 1.0579         | 0.078213  | 0.464305 | 0.177782  |
| 15         | Freeze On | May  | 250             | 5202       | 0.159491     | 2.78119        | 2.18871 | 0.082139  | 100.78  | -11.487  | 36.31   | 1.5744  | 171.781 | 66.5626    | 64.4649       | 0.19394       | 0.170292 | 0.105079      | 0.17926       | 0.74688  | 0.38349                       | 0.48466      | 0.089342                                       | 4.46787    | 0.239045 | 0.609967    | 15.8387      | 2.47209  | 24.0992  | 3.90926  | 2.94506                       | 0.509007     | 0.509007 | 0.892723 | 121.502  | 27.0038  | 0.474597       | 0.047009  | 0.307173 | 0.126104  |
| 16         | Freeze On | May  | 0               | 6959       | 0.133874     | 1.1182         | 1.88737 | 0.074427  | 100.33  | -9.68    | 32.59   | 5.10744 | 148.451 | 54.8987    | 1.0503        | 1.93909       | 0.181766 | 0.046462      | 0.133815      | 0.25807  | 0.442954                      | 0.727902     | 0.073734                                       | 126.131    | 5.82412  | 0.39647     | 5.6757       | 1.55659  | 26.395   | 34.088   | 23.9193                       | 6.07655      | 1.74718  | 1.86343  | 321.98   | 209.928  | 0.635676       | 0.0684703 | 0.191349 | 0.103169  |
| 17         | Freeze On | May  | 0               | 6959       | 0.123314     | 1.57735        | 2.06564 | 0.081345  | 100.08  | -10.13   | 33.83   | 15.2735 | 54.8987 | 1.0503     | 1.93909       | 0.181766      | 0.046462 | 0.133815      | 0.25807       | 0.442954 | 0.727902                      | 0.073734     | 126.131                                        | 5.82412    | 0.39647  | 5.6757      | 1.55659      | 26.395   | 34.088   | 23.9193  | 6.07655                       | 1.74718      | 1.86343  | 321.98   | 209.928  | 0.635676 | 0.0684703      | 0.191349  | 0.103169 |           |
| 18         | Freeze On | May  | 0               | 6959       | 0.160584     | 1.53889        | 1.66571 | 0.092954  | 98.78   | -13.64   | 46.91   | 7.43256 | 184.5   | 54.8987    | 1.0503        | 1.93909       | 0.181766 | 0.046462      | 0.133815      | 0.25807  | 0.442954                      | 0.727902     | 0.073734                                       | 126.131    | 5.82412  | 0.39647     | 5.6757       | 1.55659  | 26.395   | 34.088   | 23.9193                       | 6.07655      | 1.74718  | 1.86343  | 321.98   | 209.928  | 0.635676       | 0.0684703 | 0.191349 | 0.103169  |
| 19         | Freeze On | May  | 0               | 6959       | 0.185112     | 1.39897        | 2.12414 | 0.091912  | 100.37  | -13.81   | 46.57   | 181.881 | 54.8987 | 1.0503     | 1.93909       | 0.181766      | 0.046462 | 0.133815      | 0.25807       | 0.442954 | 0.727902                      | 0.073734     | 126.131                                        | 5.82412    | 0.39647  | 5.6757      | 1.55659      | 26.395   | 34.088   | 23.9193  | 6.07655                       | 1.74718      | 1.86343  | 321.98   | 209.928  | 0.635676 | 0.0684703      | 0.191349  | 0.103169 |           |
| 20         | Freeze On | May  | 0               | 6959       | 0.154608     | 1.47621        | 1.61071 | 0.070783  | 102.49  | -9.66    | 28.11   | 2.80047 | 128.097 | 41.0856    | 0.51231       | 1.43789       | 0.178849 | 0.011233      | 0.07603       | 0.852997 | 0.545973                      | 0.41566      | 0.117378                                       | 3.26122    | 0.267876 | 0.073055    | 12.7075      | 0.602023 | 22.6745  | 4.09923  | 5.49994                       | 3.65259      | 1.04807  | 1.15821  | 100.054  | 25.9154  | 0.619153       | 0.0667013 | 0.213893 | 0.0887179 |
| 21         | Freeze On | May  | 100             | 6959       | 0.122073     | 1.79705        | 1.77232 | 0.079038  | 103.88  | -11.7    | 39.305  | 4.53735 | 132.241 | 41.0856    | 0.51231       | 1.43789       | 0.178849 | 0.011233      | 0.07603       | 0.852997 | 0.545973                      | 0.41566      | 0.117378                                       | 3.26122    | 0.267876 | 0.073055    | 12.7075      | 0.602023 | 22.6745  | 4.09923  | 5.49994                       | 3.65259      | 1.04807  | 1.15821  | 100.054  | 25.9154  | 0.619153       | 0.0667013 | 0.213893 | 0.0887179 |
| 22         | Freeze On | May  | 100             | 6959       | 0.125845     | 1.27262        | 2.744   | 0.074954  | 102.37  | -10.205  | 34.665  | 1.5744  | 171.781 | 66.5626    | 64.4649       | 0.19394       | 0.170292 | 0.105079      | 0.17926       | 0.74688  | 0.38349                       | 0.48466      | 0.089342                                       | 4.46787    | 0.239045 | 0.609967    | 15.8387      | 2.47209  | 24.0992  | 3.90926  | 2.94506                       | 0.509007     | 0.509007 | 0.892723 | 121.502  | 27.0038  | 0.474597       | 0.047009  | 0.307173 | 0.126104  |
| 23         | Freeze On | May  | 100             | 6959       | 0.130207     | 1.85334        | 1.76968 | 0.079468  | 102.05  | -11.9    | 36.7562 | 4.10313 | 205.265 | 41.0856    | 0.51231       | 1.43789       | 0.178849 | 0.011233      | 0.07603       | 0.852997 | 0.545973                      | 0.41566      | 0.117378                                       | 3.26122    | 0.267876 | 0.073055    | 12.7075      | 0.602023 | 22.6745  | 4.09923  | 5.49994                       | 3.65259      | 1.04807  | 1.15821  | 100.054  | 25.9154  | 0.619153       | 0.0667013 | 0.213893 | 0.0887179 |
| 24         | Freeze On | May  | 100             | 6959       | 0.120728     | 2.12663        | 1.78812 | 0.0784807 | 99.805  | -11.385  | 39.32   | 3.0019  | 166.882 | 74.4987    | 0.471857      | 1.28939       | 0.402861 | 0.0076012     | 0.137031      | 1.48581  | 0.41867                       | 0.74636      | 0.305013                                       | 9.6009     | 0.219918 | 0.420187    | 14.177       | 1.93     | 28.3437  | 5.19832  | 3.34495                       | 2.63507      | 1.17172  | 1.04988  | 146.887  | 32.5568  | 0.338616       | 0.0941832 | 0.424323 | 0.197155  |
| 25         | Freeze On | May  | 100             | 6959       | 0.151789     | 1.84031        | 1.80913 | 0.085717  | 98.785  | -13.65   | 45.84   | 1.86099 | 209.565 | 74.4987    | 0.471857      | 1.28939       | 0.402861 | 0.0076012     | 0.137031      | 1.48581  | 0.41867                       | 0.74636      | 0.305013                                       | 9.6009     | 0.219918 | 0.420187    | 14.177       | 1.93     | 28.3437  | 5.19832  | 3.34495                       | 2.63507      | 1.17172  | 1.04988  | 146.887  | 32.5568  | 0.338616       | 0.0941832 | 0.424323 | 0.197155  |
| 26         | Freeze On | May  | 100             | 6959       | 0.130623     | 1.9            |         |           |         |          |         |         |         |            |               |               |          |               |               |          |                               |              |                                                |            |          |             |              |          |          |          |                               |              |          |          |          |          |                |           |          |           |

|     |        |      |     |      |          |         |          |           |         |          |         |         |         |          |          |          |          |          |          |           |          |          |          |          |          |          |          |          |         |         |         |         |          |          |          |         |          |           |          |          |          |
|-----|--------|------|-----|------|----------|---------|----------|-----------|---------|----------|---------|---------|---------|----------|----------|----------|----------|----------|----------|-----------|----------|----------|----------|----------|----------|----------|----------|----------|---------|---------|---------|---------|----------|----------|----------|---------|----------|-----------|----------|----------|----------|
| 116 | Freeze | June | 250 | 8718 | 0.223147 | 3.7546  | 2.37039  | 0.0976748 | 103.014 | 8.0937   | 24.1336 | 4.0364  | 163.321 | 34.3685  | 0.334654 | 1.14027  | 0.405373 | 0.106869 | 0.122066 | 0.335951  | 0.188134 | 0.335372 | 0.099779 | 1.46732  | 0.248412 | 0.348001 | 3.82189  | 1.69094  | 25.4052 | 3.40439 | 2.26635 | 1.7729  | 0.718413 | 0.627239 | 79.6515  | 11.108  | 0.779271 | 0.043443  | 0.206973 | 0.118886 |          |
| 117 | Freeze | June | 250 | 8718 | 0.216453 | 1.64196 | 2.29957  | 0.0974046 | 99.521  | -7.8089  | 22.4096 | 3.9153  | 158.421 | 34.3685  | 0.334654 | 1.14027  | 0.405373 | 0.106869 | 0.122066 | 0.335951  | 0.188134 | 0.335372 | 0.099779 | 1.46732  | 0.248412 | 0.348001 | 3.82189  | 1.69094  | 25.4052 | 3.40439 | 2.26635 | 1.7729  | 0.718413 | 0.627239 | 79.6515  | 11.108  | 0.779271 | 0.043443  | 0.206973 | 0.118886 |          |
| 118 | Freeze | June | 250 | 8718 | 0.216247 | 4.13984 | 2.00377  | 0.0773849 | 100.373 | -9.42    | 31.87   | 17.5416 | 126.064 | 41.002   | 0.448025 | 0.137134 | 0.34535  | 0.002997 | 0.280027 | 0.0027468 | 1.11019  | 0.12488  | 1.57971  | 0.550135 | 1.48731  | 0.646311 | 0.448025 | 3.82189  | 1.69094 | 25.4052 | 3.40439 | 2.26635 | 1.7729   | 0.718413 | 0.627239 | 79.6515 | 11.108   | 0.779271  | 0.043443 | 0.206973 | 0.118886 |
| 119 | Freeze | June | 250 | 8718 | 0.202979 | 4.06996 | 1.94366  | 0.0750364 | 97.5553 | 13.3714  | 30.9139 | 17.1013 | 122.282 | 49.002   | 0.448025 | 0.137134 | 0.34535  | 0.002997 | 0.280027 | 0.0027468 | 1.11019  | 0.12488  | 1.57971  | 0.550135 | 1.48731  | 0.646311 | 0.448025 | 3.82189  | 1.69094 | 25.4052 | 3.40439 | 2.26635 | 1.7729   | 0.718413 | 0.627239 | 79.6515 | 11.108   | 0.779271  | 0.043443 | 0.206973 | 0.118886 |
| 120 | Freeze | June | 250 | 8718 | 0.222815 | 4.34269 | 2.07781  | 0.0870934 | 104.093 | 8.7497   | 32.9855 | 18.5555 | 140.076 | 49.002   | 0.448025 | 0.137134 | 0.34535  | 0.002997 | 0.280027 | 0.0027468 | 1.11019  | 0.12488  | 1.57971  | 0.550135 | 1.48731  | 0.646311 | 0.448025 | 3.82189  | 1.69094 | 25.4052 | 3.40439 | 2.26635 | 1.7729   | 0.718413 | 0.627239 | 79.6515 | 11.108   | 0.779271  | 0.043443 | 0.206973 | 0.118886 |
| 121 | Freeze | June | 250 | 8718 | 0.217101 | 4.27195 | 2.06795  | 0.087136  | 100.37  | 8.46232  | 31.9959 | 17.6109 | 126.064 | 41.002   | 0.448025 | 0.137134 | 0.34535  | 0.002997 | 0.280027 | 0.0027468 | 1.11019  | 0.12488  | 1.57971  | 0.550135 | 1.48731  | 0.646311 | 0.448025 | 3.82189  | 1.69094 | 25.4052 | 3.40439 | 2.26635 | 1.7729   | 0.718413 | 0.627239 | 79.6515 | 11.108   | 0.779271  | 0.043443 | 0.206973 | 0.118886 |
| 122 | Freeze | June | 250 | 8718 | 0.192639 | 3.18126 | 1.98831  | 0.0780031 | 96.745  | -12.485  | 46.255  | 124.763 | 35.71   | 0.281353 | 1.19302  | 0.893588 | 0.048737 | 0.12003  | 0.34535  | 0.142988  | 0.32806  | 0.22325  | 1.36429  | 0.216027 | 0.47892  | 0.57781  | 0.411312 | 0.26688  | 3.23258 | 1.47945 | 2.06405 | 1.72332 | 0.706475 | 0.71808  | 79.3083  | 11.382  | 0.79987  | 0.056507  | 0.13805  | 0.043912 |          |
| 123 | Freeze | June | 250 | 8718 | 0.18886  | 1.08776 | 1.93836  | 0.071988  | 88.8427 | -12.1104 | 44.8784 | 129.13  | 35.71   | 0.281353 | 1.19302  | 0.893588 | 0.048737 | 0.12003  | 0.34535  | 0.142988  | 0.32806  | 0.22325  | 1.36429  | 0.216027 | 0.47892  | 0.57781  | 0.411312 | 0.26688  | 3.23258 | 1.47945 | 2.06405 | 1.72332 | 0.706475 | 0.71808  | 79.3083  | 11.382  | 0.79987  | 0.056507  | 0.13805  | 0.043912 |          |
| 124 | Freeze | June | 250 | 8718 | 0.198245 | 1.09383 | 0.076396 | 0.076396  | 99.521  | -12.1104 | 44.8784 | 129.13  | 35.71   | 0.281353 | 1.19302  | 0.893588 | 0.048737 | 0.12003  | 0.34535  | 0.142988  | 0.32806  | 0.22325  | 1.36429  | 0.216027 | 0.47892  | 0.57781  | 0.411312 | 0.26688  | 3.23258 | 1.47945 | 2.06405 | 1.72332 | 0.706475 | 0.71808  | 79.3083  | 11.382  | 0.79987  | 0.056507  | 0.13805  | 0.043912 |          |
| 125 | Freeze | June | 250 | 8718 | 0.198245 | 1.09383 | 0.076396 | 0.076396  | 99.521  | -12.1104 | 44.8784 | 129.13  | 35.71   | 0.281353 | 1.19302  | 0.893588 | 0.048737 | 0.12003  | 0.34535  | 0.142988  | 0.32806  | 0.22325  | 1.36429  | 0.216027 | 0.47892  | 0.57781  | 0.411312 | 0.26688  | 3.23258 | 1.47945 | 2.06405 | 1.72332 | 0.706475 | 0.71808  | 79.3083  | 11.382  | 0.79987  | 0.056507  | 0.13805  | 0.043912 |          |
| 126 | Freeze | June | 250 | 8718 | 0.192639 | 3.18126 | 1.98831  | 0.078313  | 96.745  | -12.485  | 46.255  | 124.763 | 35.71   | 0.281353 | 1.19302  | 0.893588 | 0.048737 | 0.12003  | 0.34535  | 0.142988  | 0.32806  | 0.22325  | 1.36429  | 0.216027 | 0.47892  | 0.57781  | 0.411312 | 0.26688  | 3.23258 | 1.47945 | 2.06405 | 1.72332 | 0.706475 | 0.71808  | 79.3083  | 11.382  | 0.79987  | 0.056507  | 0.13805  | 0.043912 |          |
| 127 | Freeze | June | 250 | 8718 | 0.18886  | 1.08776 | 1.93836  | 0.071987  | 88.8427 | -12.1104 | 44.8784 | 129.13  | 35.71   | 0.281353 | 1.19302  | 0.893588 | 0.048737 | 0.12003  | 0.34535  | 0.142988  | 0.32806  | 0.22325  | 1.36429  | 0.216027 | 0.47892  | 0.57781  | 0.411312 | 0.26688  | 3.23258 | 1.47945 | 2.06405 | 1.72332 | 0.706475 | 0.71808  | 79.3083  | 11.382  | 0.79987  | 0.056507  | 0.13805  | 0.043912 |          |
| 128 | Freeze | June | 250 | 8718 | 0.191981 | 1.2968  | 1.98831  | 0.076396  | 99.521  | -12.1104 | 44.8784 | 129.13  | 35.71   | 0.281353 | 1.19302  | 0.893588 | 0.048737 | 0.12003  | 0.34535  | 0.142988  | 0.32806  | 0.22325  | 1.36429  | 0.216027 | 0.47892  | 0.57781  | 0.411312 | 0.26688  | 3.23258 | 1.47945 | 2.06405 | 1.72332 | 0.706475 | 0.71808  | 79.3083  | 11.382  | 0.79987  | 0.056507  | 0.13805  | 0.043912 |          |
| 129 | Freeze | June | 250 | 8718 | 0.191981 | 1.2968  | 1.98831  | 0.076396  | 99.521  | -12.1104 | 44.8784 | 129.13  | 35.71   | 0.281353 | 1.19302  | 0.893588 | 0.048737 | 0.12003  | 0.34535  | 0.142988  | 0.32806  | 0.22325  | 1.36429  | 0.216027 | 0.47892  | 0.57781  | 0.411312 | 0.26688  | 3.23258 | 1.47945 | 2.06405 | 1.72332 | 0.706475 | 0.71808  | 79.3083  | 11.382  | 0.79987  | 0.056507  | 0.13805  | 0.043912 |          |
| 130 | Freeze | June | 250 | 8718 | 0.21334  | 1.07795 | 2.1363   | 0.0741047 | 97.171  | -12.5343 | 46.4377 | 131.424 | 36.4    | 0.27349  | 0.669007 | 1.44119  | 0.89773  | 0.266139 | 0.423593 | 0.95447   | 0.51581  | 0.28955  | 0.602005 | 1.5483   | 1.17312  | 0.317623 | 0.12672  | 0.797998 | 3.4582  | 3.25758 | 1.5715  | 4.19275 | 1.24084  | 1.07572  | 121.604  | 20.818  | 0.451032 | 0.0530873 | 0.204878 | 0.044065 |          |
| 131 | Freeze | June | 250 | 8718 | 0.21334  | 1.07795 | 2.1363   | 0.0741047 | 97.171  | -12.5343 | 46.4377 | 131.424 | 36.4    | 0.27349  | 0.669007 | 1.44119  | 0.89773  | 0.266139 | 0.423593 | 0.95447   | 0.51581  | 0.28955  | 0.602005 | 1.5483   | 1.17312  | 0.317623 | 0.12672  | 0.797998 | 3.4582  | 3.25758 | 1.5715  | 4.19275 | 1.24084  | 1.07572  | 121.604  | 20.818  | 0.451032 | 0.0530873 | 0.204878 | 0.044065 |          |
| 132 | Freeze | June | 250 | 8718 | 0.216247 | 4.13984 | 2.00377  | 0.0773849 | 100.373 | -9.42    | 31.87   | 17.5401 | 126.064 | 41.002   | 0.448025 | 0.137134 | 0.34535  | 0.002997 | 0.280027 | 0.0027468 | 1.11019  | 0.12488  | 1.57971  | 0.550135 | 1.48731  | 0.646311 | 0.448025 | 3.82189  | 1.69094 | 25.4052 | 3.40439 | 2.26635 | 1.7729   | 0.718413 | 0.627239 | 79.6515 | 11.108   | 0.779271  | 0.043443 | 0.206973 | 0.118886 |
| 133 | Freeze | June | 250 | 8718 | 0.202979 | 4.06996 | 1.94366  | 0.0750364 | 97.5553 | 13.3714  | 30.9139 | 17.1013 | 122.282 | 49.002   | 0.448025 | 0.137134 | 0.34535  | 0.002997 | 0.280027 | 0.0027468 | 1.11019  | 0.12488  | 1.57971  | 0.550135 | 1.48731  | 0.646311 | 0.448025 | 3.82189  | 1.69094 | 25.4052 | 3.40439 | 2.26635 | 1.7729   | 0.718413 | 0.627239 | 79.6515 | 11.108   | 0.779271  | 0.043443 | 0.206973 | 0.118886 |
| 134 | Freeze | June | 250 | 8718 | 0.222815 | 4.34269 | 2.07781  | 0.0870934 | 104.093 | 8.7497   | 32.9855 | 18.5555 | 140.076 | 49.002   | 0.448025 | 0.137134 | 0.34535  | 0.002997 | 0.280027 | 0.0027468 | 1.11019  | 0.12488  | 1.57971  | 0.550135 | 1.48731  | 0.646311 | 0.448025 | 3.82189  | 1.69094 | 25.4052 | 3.40439 | 2.26635 | 1.7729   | 0.718413 | 0.627239 | 79.6515 | 11.108   | 0.779271  | 0.043443 | 0.206973 | 0.118886 |
| 135 | Freeze | June | 250 | 8718 | 0.217101 | 4.27195 | 2.06795  | 0.087136  | 100.37  | 8.46232  | 31.9959 | 17.6109 | 126.064 | 41.002   | 0.448025 | 0.137134 | 0.34535  | 0.002997 | 0.280027 | 0.0027468 | 1.11019  | 0.12488  | 1.57971  | 0.550135 | 1.48731  | 0.646311 | 0.448025 | 3.82189  | 1.69094 | 25.4052 | 3.40439 | 2.26635 | 1.7729   | 0.718413 | 0.627239 | 79.6515 | 11.108   | 0.779271  | 0.043443 | 0.206973 | 0.118886 |
| 136 | Freeze | June | 250 | 8718 | 0.192639 | 3.18126 | 1.98831  | 0.0780031 | 96.745  | -12.485  | 46.255  | 124.763 | 35.71   | 0.281353 | 1.19302  | 0.893588 | 0.048737 | 0.12003  | 0.34535  | 0.142988  | 0.32806  | 0.22325  | 1.36429  | 0.216027 | 0.47892  | 0.57781  | 0.411312 | 0.26688  | 3.23258 | 1.47945 | 2.06405 | 1.72332 | 0.706475 | 0.71808  | 79.3083  | 11.382  | 0.79987  | 0.056507  | 0.13805  | 0.043912 |          |
| 137 | Freeze | June | 250 | 8718 | 0.18886  | 1.08776 | 1.93836  | 0.071988  | 88.8427 | -12.1104 | 44.8784 | 129.13  | 35.71   | 0.281353 | 1.19302  | 0.893588 | 0.048737 | 0.12003  | 0.34535  | 0.142988  | 0.32806  | 0.22325  | 1.36429  | 0.216027 | 0.47892  | 0.57781  | 0.411312 | 0.26688  | 3.23258 | 1.47945 | 2.06405 | 1.72332 | 0.706475 | 0.71808  | 79.3083  | 11.382  | 0.79987  | 0.056507  | 0.13805  | 0.043912 |          |
| 138 | Freeze | June | 250 | 8718 | 0.198245 | 1.09383 | 0.076396 | 0.076396  | 99.521  | -12.1104 | 44.8784 | 129.13  | 35.71   | 0.281353 | 1.19302  | 0.893588 | 0.048737 | 0.12003  | 0.34535  | 0.142988  | 0.32806  | 0.22325  | 1.36429  | 0.216027 | 0.47892  | 0.57781  | 0.411312 | 0.26688  | 3.23258 | 1.47945 | 2.06405 | 1.72332 | 0.706475 | 0.71808  | 79.3083  | 11.382  | 0.79987  | 0.056507  | 0.13805  | 0.043912 |          |
| 139 | Freeze | June | 250 | 8718 | 0.198245 | 1.09383 | 0.076396 | 0.076396  | 99.521  | -12.1104 | 44.8784 | 129.13  | 35.71   | 0.281353 | 1.19302  | 0.893588 | 0.048737 | 0.12003  | 0.34535  | 0.142988  | 0.32806  | 0.22325  | 1.36429  | 0.216027 | 0.47892  | 0.57781  | 0.411312 | 0.26688  | 3.23258 | 1.47945 | 2.06405 | 1.72332 | 0.706475 | 0.71808  | 79.3083  | 11.382  | 0.79987  | 0.056507  | 0.13805  | 0.043912 |          |
| 140 | Freeze | June | 250 | 8718 | 0.192639 | 3.18126 | 1.98831  | 0.078313  | 96.745  | -12.485  | 46.255  | 124.763 | 35.71   | 0.281353 | 1.19302  | 0.893588 | 0.048737 | 0.12003  | 0.34535  | 0.142988  | 0.32806  | 0.22325  | 1.36429  | 0.216027 | 0.47892  | 0.57781  | 0.411312 | 0.26688  | 3.23258 | 1.47945 | 2.06405 | 1.72332 | 0.706475 | 0.71808  | 79.3083  | 11.382  | 0.79987  | 0.056507  | 0.13805  | 0.043912 |          |
| 141 | Freeze | June | 250 | 8718 | 0.18886  | 1.08776 | 1.93836  | 0.071987  | 88.8427 | -12.1104 | 44.8784 | 129.13  | 35.71   | 0.281353 | 1.19302  | 0.893588 | 0.048737 |          |          |           |          |          |          |          |          |          |          |          |         |         |         |         |          |          |          |         |          |           |          |          |          |

|     |            |      |     |      |           |         |         |           |         |          |         |         |         |         |          |         |          |           |          |          |          |          |          |           |           |          |          |          |         |         |         |          |          |          |         |          |          |          |          |         |
|-----|------------|------|-----|------|-----------|---------|---------|-----------|---------|----------|---------|---------|---------|---------|----------|---------|----------|-----------|----------|----------|----------|----------|----------|-----------|-----------|----------|----------|----------|---------|---------|---------|----------|----------|----------|---------|----------|----------|----------|----------|---------|
| 232 | Fresh Fish | May  | 250 | 8718 | 0.144246  | 5.17604 | 2.32382 | 0.130612  | 55.6571 | -2.64442 | 26.5798 | 4.9048  | 158.869 | 91.9324 | 0.737373 | 2.45154 | 0.74943  | 0.0717967 | 0.108931 | 0.073737 | 0.177889 | 0.409839 | 0.181594 | 8.39647   | 0.0067076 | 0.10951  | 12.425   | 0.216315 | 29.862  | 5.16779 | 431726  | 2.74027  | 0.721675 | 0.980859 | 163.057 | 30.376   | 0.470105 | 0.071359 | 1.17184  | 0.23043 |
| 233 | Fresh Fish | June | 250 | 8718 | 0.139919  | 5.02085 | 2.25411 | 0.075932  | 53.874  | -2.56509 | 27.834  | 4.75766 | 154.103 | 97.1184 | 0.717128 | 1.37799 | 0.720497 | 0.0717268 | 0.105643 | 0.095956 | 0.037645 | 0.16146  | 8.4348   | 0.0067635 | 0.124242  | 12.0222  | 0.230925 | 28.9661  | 5.02925 | 418774  | 2.65797 | 0.720302 | 0.954343 | 158.105  | 29.6568 | 0.470105 | 0.071359 | 1.18086  | 0.22517  |         |
| 234 | Fresh Fish | July | 250 | 8718 | 0.137271  | 4.87023 | 2.18048 | 0.064064  | 51.2088 | -2.48414 | 25.908  | 4.45493 | 149.48  | 96.868  | 0.690687 | 1.23065 | 0.705138 | 0.065168  | 0.102493 | 0.072609 | 0.155528 | 0.180427 | 7.90024  | 0.0067008 | 0.123362  | 11.4007  | 0.230931 | 28.9071  | 5.02925 | 418774  | 2.65797 | 0.720302 | 0.954343 | 158.105  | 29.6568 | 0.470105 | 0.071359 | 1.18086  | 0.22517  |         |
| 235 | Fresh Fish | Aug  | 250 | 8718 | 0.144816  | 5.19608 | 2.381   | 0.131029  | 59.877  | -2.45047 | 26.7638 | 4.81428 | 159.487 | 97.4858 | 0.736238 | 2.46122 | 0.738977 | 0.0717268 | 0.105643 | 0.095956 | 0.037645 | 0.16146  | 8.4348   | 0.0067635 | 0.124242  | 12.0222  | 0.230925 | 28.9661  | 5.02925 | 418774  | 2.65797 | 0.720302 | 0.954343 | 158.105  | 29.6568 | 0.470105 | 0.071359 | 1.18086  | 0.22517  |         |
| 236 | Fresh Fish | Oct  | 250 | 8718 | 0.140471  | 5.04069 | 2.26301 | 0.097787  | 54.2097 | -2.57322 | 25.8843 | 4.77645 | 154.712 | 97.3132 | 0.71451  | 1.38719 | 0.729818 | 0.0717311 | 0.106071 | 0.093109 | 0.037645 | 0.16146  | 8.4348   | 0.0067635 | 0.124242  | 12.0222  | 0.230925 | 28.9661  | 5.02925 | 418774  | 2.65797 | 0.720302 | 0.954343 | 158.105  | 29.6568 | 0.470105 | 0.071359 | 1.18086  | 0.22517  |         |
| 237 | Fresh Fish | Nov  | 250 | 8718 | 0.140884  | 4.27967 | 1.9085  | 0.050615  | 101.345 | -4.027   | 28.2663 | 5.15258 | 174.744 | 104.842 | 0.681672 | 1.17434 | 0.743442 | 0.065168  | 0.102493 | 0.072609 | 0.155528 | 0.180427 | 7.90024  | 0.0067008 | 0.123362  | 11.4007  | 0.230931 | 28.9071  | 5.02925 | 418774  | 2.65797 | 0.720302 | 0.954343 | 158.105  | 29.6568 | 0.470105 | 0.071359 | 1.18086  | 0.22517  |         |
| 238 | Fresh Fish | Dec  | 250 | 8718 | 0.150247  | 4.20704 | 1.70848 | 0.0957298 | 120.209 | -8.925   | 24.6335 | 5.28803 | 133.253 | 38.2463 | 0.716717 | 1.1784  | 0.843482 | 0.064865  | 0.101761 | 0.094258 | 0.037645 | 0.16146  | 8.4348   | 0.0067635 | 0.124242  | 12.0222  | 0.230925 | 28.9661  | 5.02925 | 418774  | 2.65797 | 0.720302 | 0.954343 | 158.105  | 29.6568 | 0.470105 | 0.071359 | 1.18086  | 0.22517  |         |
| 239 | Fresh Fish | Jan  | 250 | 8718 | 0.128066  | 4.342   | 1.99799 | 0.0962304 | 108.187 | -8.9475  | 29.3    | 2.93645 | 142.594 | 38.2463 | 0.750617 | 1.1784  | 0.843482 | 0.064865  | 0.101761 | 0.094258 | 0.037645 | 0.16146  | 8.4348   | 0.0067635 | 0.124242  | 12.0222  | 0.230925 | 28.9661  | 5.02925 | 418774  | 2.65797 | 0.720302 | 0.954343 | 158.105  | 29.6568 | 0.470105 | 0.071359 | 1.18086  | 0.22517  |         |
| 240 | Fresh Fish | Feb  | 250 | 8718 | 0.1317156 | 4.22452 | 1.86161 | 0.087166  | 105.315 | -9.38625 | 30.9725 | 1.12625 | 137.617 | 38.2463 | 0.750617 | 1.1784  | 0.843482 | 0.064865  | 0.101761 | 0.094258 | 0.037645 | 0.16146  | 8.4348   | 0.0067635 | 0.124242  | 12.0222  | 0.230925 | 28.9661  | 5.02925 | 418774  | 2.65797 | 0.720302 | 0.954343 | 158.105  | 29.6568 | 0.470105 | 0.071359 | 1.18086  | 0.22517  |         |
| 241 | Fresh Fish | Mar  | 250 | 8718 | 0.126511  | 3.85651 | 1.80246 | 0.087166  | 105.315 | -9.38625 | 30.9725 | 1.12625 | 137.617 | 38.2463 | 0.750617 | 1.1784  | 0.843482 | 0.064865  | 0.101761 | 0.094258 | 0.037645 | 0.16146  | 8.4348   | 0.0067635 | 0.124242  | 12.0222  | 0.230925 | 28.9661  | 5.02925 | 418774  | 2.65797 | 0.720302 | 0.954343 | 158.105  | 29.6568 | 0.470105 | 0.071359 | 1.18086  | 0.22517  |         |
| 242 | Fresh Fish | Apr  | 250 | 8718 | 0.120127  | 0       | 2.24841 | 0.0992349 | 106.785 | -4.5784  | 28.1231 | 3.50618 | 129.381 | 86.7235 | 0.395136 | 1.49666 | 0.369355 | 0.0821219 | 0.10378  | 0.062178 | 0.33063  | 0.975158 | 0.045565 | 0.548628  | 0.47352   | 0.248126 | 0.331263 | 0.81263  | 2.64973 | 5.51396 | 4.92347 | 1.31597  | 1.2631   | 143.991  | 21.579  | 0.511766 | 0.060406 | 0.281116 | 0.110086 |         |
| 243 | Fresh Fish | May  | 250 | 8718 | 0.120924  | 0       | 2.24841 | 0.105885  | 98.7205 | -4.8322  | 24.7625 | 7.1413  | 106.8   | 86.7235 | 0.395136 | 1.49666 | 0.369355 | 0.0821219 | 0.10378  | 0.062178 | 0.33063  | 0.975158 | 0.045565 | 0.548628  | 0.47352   | 0.248126 | 0.331263 | 0.81263  | 2.64973 | 5.51396 | 4.92347 | 1.31597  | 1.2631   | 143.991  | 21.579  | 0.511766 | 0.060406 | 0.281116 | 0.110086 |         |
| 244 | Fresh Fish | Jun  | 250 | 8718 | 0.120924  | 0       | 2.24841 | 0.105885  | 98.7205 | -4.8322  | 24.7625 | 7.1413  | 106.8   | 86.7235 | 0.395136 | 1.49666 | 0.369355 | 0.0821219 | 0.10378  | 0.062178 | 0.33063  | 0.975158 | 0.045565 | 0.548628  | 0.47352   | 0.248126 | 0.331263 | 0.81263  | 2.64973 | 5.51396 | 4.92347 | 1.31597  | 1.2631   | 143.991  | 21.579  | 0.511766 | 0.060406 | 0.281116 | 0.110086 |         |
| 245 | Fresh Fish | Jul  | 250 | 8718 | 0.120924  | 0       | 2.24841 | 0.105885  | 98.7205 | -4.8322  | 24.7625 | 7.1413  | 106.8   | 86.7235 | 0.395136 | 1.49666 | 0.369355 | 0.0821219 | 0.10378  | 0.062178 | 0.33063  | 0.975158 | 0.045565 | 0.548628  | 0.47352   | 0.248126 | 0.331263 | 0.81263  | 2.64973 | 5.51396 | 4.92347 | 1.31597  | 1.2631   | 143.991  | 21.579  | 0.511766 | 0.060406 | 0.281116 | 0.110086 |         |
| 246 | Fresh Fish | Aug  | 250 | 8718 | 0.120924  | 0       | 2.24841 | 0.105885  | 98.7205 | -4.8322  | 24.7625 | 7.1413  | 106.8   | 86.7235 | 0.395136 | 1.49666 | 0.369355 | 0.0821219 | 0.10378  | 0.062178 | 0.33063  | 0.975158 | 0.045565 | 0.548628  | 0.47352   | 0.248126 | 0.331263 | 0.81263  | 2.64973 | 5.51396 | 4.92347 | 1.31597  | 1.2631   | 143.991  | 21.579  | 0.511766 | 0.060406 | 0.281116 | 0.110086 |         |
| 247 | Fresh Fish | Oct  | 250 | 8718 | 0.120924  | 0       | 2.24841 | 0.105885  | 98.7205 | -4.8322  | 24.7625 | 7.1413  | 106.8   | 86.7235 | 0.395136 | 1.49666 | 0.369355 | 0.0821219 | 0.10378  | 0.062178 | 0.33063  | 0.975158 | 0.045565 | 0.548628  | 0.47352   | 0.248126 | 0.331263 | 0.81263  | 2.64973 | 5.51396 | 4.92347 | 1.31597  | 1.2631   | 143.991  | 21.579  | 0.511766 | 0.060406 | 0.281116 | 0.110086 |         |
| 248 | Fresh Fish | Nov  | 250 | 8718 | 0.120924  | 0       | 2.24841 | 0.105885  | 98.7205 | -4.8322  | 24.7625 | 7.1413  | 106.8   | 86.7235 | 0.395136 | 1.49666 | 0.369355 | 0.0821219 | 0.10378  | 0.062178 | 0.33063  | 0.975158 | 0.045565 | 0.548628  | 0.47352   | 0.248126 | 0.331263 | 0.81263  | 2.64973 | 5.51396 | 4.92347 | 1.31597  | 1.2631   | 143.991  | 21.579  | 0.511766 | 0.060406 | 0.281116 | 0.110086 |         |
| 249 | Fresh Fish | Dec  | 250 | 8718 | 0.120924  | 0       | 2.24841 | 0.105885  | 98.7205 | -4.8322  | 24.7625 | 7.1413  | 106.8   | 86.7235 | 0.395136 | 1.49666 | 0.369355 | 0.0821219 | 0.10378  | 0.062178 | 0.33063  | 0.975158 | 0.045565 | 0.548628  | 0.47352   | 0.248126 | 0.331263 | 0.81263  | 2.64973 | 5.51396 | 4.92347 | 1.31597  | 1.2631   | 143.991  | 21.579  | 0.511766 | 0.060406 | 0.281116 | 0.110086 |         |
| 250 | Fresh Fish | Jan  | 250 | 8718 | 0.120924  | 0       | 2.24841 | 0.105885  | 98.7205 | -4.8322  | 24.7625 | 7.1413  | 106.8   | 86.7235 | 0.395136 | 1.49666 | 0.369355 | 0.0821219 | 0.10378  | 0.062178 | 0.33063  | 0.975158 | 0.045565 | 0.548628  | 0.47352   | 0.248126 | 0.331263 | 0.81263  | 2.64973 | 5.51396 | 4.92347 | 1.31597  | 1.2631   | 143.991  | 21.579  | 0.511766 | 0.060406 | 0.281116 | 0.110086 |         |
| 251 | Fresh Fish | Feb  | 250 | 8718 | 0.120924  | 0       | 2.24841 | 0.105885  | 98.7205 | -4.8322  | 24.7625 | 7.1413  | 106.8   | 86.7235 | 0.395136 | 1.49666 | 0.369355 | 0.0821219 | 0.10378  | 0.062178 | 0.33063  | 0.975158 | 0.045565 | 0.548628  | 0.47352   | 0.248126 | 0.331263 | 0.81263  | 2.64973 | 5.51396 | 4.92347 | 1.31597  | 1.2631   | 143.991  | 21.579  | 0.511766 | 0.060406 | 0.281116 | 0.110086 |         |
| 252 | Fresh Fish | Mar  | 250 | 8718 | 0.120924  | 0       | 2.24841 | 0.105885  | 98.7205 | -4.8322  | 24.7625 | 7.1413  | 106.8   | 86.7235 | 0.395136 | 1.49666 | 0.369355 | 0.0821219 | 0.10378  | 0.062178 | 0.33063  | 0.975158 | 0.045565 | 0.548628  | 0.47352   | 0.248126 | 0.331263 | 0.81263  | 2.64973 | 5.51396 | 4.92347 | 1.31597  | 1.2631   | 143.991  | 21.579  | 0.511766 | 0.060406 | 0.281116 | 0.110086 |         |
| 253 | Fresh Fish | Apr  | 250 | 8718 | 0.120924  | 0       | 2.24841 | 0.105885  | 98.7205 | -4.8322  | 24.7625 | 7.1413  | 106.8   | 86.7235 | 0.395136 | 1.49666 | 0.369355 | 0.0821219 | 0.10378  | 0.062178 | 0.33063  | 0.975158 | 0.045565 | 0.548628  | 0.47352   | 0.248126 | 0.331263 | 0.81263  | 2.64973 | 5.51396 | 4.92347 | 1.31597  | 1.2631   | 143.991  | 21.579  | 0.511766 | 0.060406 | 0.281116 | 0.110086 |         |
| 254 | Fresh Fish | May  | 250 | 8718 | 0.120924  | 0       | 2.24841 | 0.105885  | 98.7205 | -4.8322  | 24.7625 | 7.1413  | 106.8   | 86.7235 | 0.395136 | 1.49666 | 0.369355 | 0.0821219 | 0.10378  | 0.062178 | 0.33063  | 0.975158 | 0.045565 | 0.548628  | 0.47352   | 0.248126 | 0.331263 | 0.81263  | 2.64973 | 5.51396 | 4.92347 | 1.31597  | 1.2631   | 143.991  | 21.579  | 0.511766 | 0.060406 | 0.281116 | 0.110086 |         |
| 255 | Fresh Fish | Jun  | 250 | 8718 | 0.120924  | 0       | 2.24841 | 0.105885  | 98.7205 | -4.8322  | 24.7625 | 7.1413  | 106.8   | 86.7235 | 0.395136 | 1.49666 | 0.369355 | 0.0821219 | 0.10378  | 0.062178 | 0.33063  | 0.975158 | 0.045565 | 0.548628  | 0.47352   | 0.248126 | 0.331263 | 0.81263  | 2.64973 | 5.51396 | 4.92347 | 1.31597  | 1.2631   | 143.991  | 21.579  | 0.511766 | 0.060406 | 0.281116 | 0.110086 |         |
| 256 | Fresh Fish | Jul  | 250 | 8718 | 0.120924  | 0       | 2.24841 | 0.105885  | 98.7205 | -4.8322  | 24.7625 | 7.1413  | 106.8   | 86.7235 | 0.395136 | 1.49666 | 0.369355 | 0.0821219 | 0.10378  | 0.062178 | 0.33063  | 0.975158 | 0.045565 | 0.548628  | 0.47352   | 0.248126 | 0.331263 | 0.81263  | 2.64973 | 5.51396 | 4.92347 | 1.31597  | 1.2631   | 143.991  | 21.579  | 0.511766 | 0.060406 | 0.281116 | 0.110086 |         |
| 257 | Fresh Fish | Aug  | 250 | 8718 | 0.120924  | 0       | 2.24841 | 0.105885  | 98.7205 | -4.8322  | 24.7625 | 7.1413  | 106.8   | 86.7235 | 0.395136 | 1.49666 | 0.369355 | 0.0821219 | 0.10378  | 0.062178 | 0.33063  | 0.975158 | 0.045565 | 0.548628  | 0.47352   | 0.248126 | 0.331263 | 0.81263  | 2.64973 | 5.51396 | 4.92347 | 1.31597  | 1.2631   | 143.991  | 21.579  | 0.511766 | 0.060406 | 0.281116 | 0.110086 |         |
| 258 | Fresh Fish | Oct  | 250 | 8718 | 0.120924  | 0       | 2.24841 | 0.105885  | 98.7205 | -4.8322  | 24.76   |         |         |         |          |         |          |           |          |          |          |          |          |           |           |          |          |          |         |         |         |          |          |          |         |          |          |          |          |         |

[illegible]



|           |           |         |           |           |         |          |           |          |          |          |          |          |         |         |          |          |          |         |         |         |         |         |         |         |   |
|-----------|-----------|---------|-----------|-----------|---------|----------|-----------|----------|----------|----------|----------|----------|---------|---------|----------|----------|----------|---------|---------|---------|---------|---------|---------|---------|---|
| 0.0181819 | 0.157209  | 8.34351 | 0.116791  | 0.0964456 | 25.308  | 0.20232  | 0.021613  | 0.180464 | 0.864026 | 9.1673   | 0.804038 | 0.440617 | 14.6967 | 1.78273 | 0.351299 | 0.499072 | 0.441613 | 2.9071  | 68.4658 | 57.5384 | 5.10998 | 3.5     | 1       | 2       | 0 |
| 0.0134021 | 0.153409  | 8.09121 | 0.111287  | 0.093523  | 24.5709 | 0.197335 | 0.020065  | 0.17705  | 0.838978 | 8.89228  | 0.813225 | 0.427798 | 14.2558 | 1.72935 | 0.34076  | 0.4841   | 0.428265 | 2.81888 | 66.4118 | 55.8122 | 4.95668 |         |         |         |   |
| 0.0127994 | 0.147718  | 7.8041  | 0.109868  | 0.0907457 | 23.8189 | 0.191221 | 0.0194786 | 0.169799 | 0.813809 | 8.42551  | 0.790738 | 0.444577 | 13.8282 | 1.67717 | 0.330537 | 0.469577 | 0.415514 | 2.78229 | 64.4035 | 54.1378 | 4.80798 |         |         |         |   |
| 0.0130765 | 0.147783  | 8.37647 | 0.117252  | 0.0962646 | 25.4609 | 0.204034 | 0.025874  | 0.181177 | 0.843758 | 9.20351  | 0.843758 | 0.442357 | 14.7458 | 1.78978 | 0.352866 | 0.501043 | 0.443358 | 2.91858 | 68.7362 | 57.7656 | 5.13017 |         |         |         |   |
| 0.0131444 | 0.153095  | 8.21517 | 0.117374  | 0.0939128 | 24.6679 | 0.197913 | 0.0200794 | 0.175742 | 0.842292 | 8.92741  | 0.818345 | 0.429087 | 14.3121 | 1.78008 | 0.342106 | 0.480012 | 0.430057 | 2.83102 | 66.6742 | 56.0237 | 4.97626 |         |         |         |   |
| 0.0142421 | 0.0807199 | 10.2134 | 0.0801887 | 0.0550322 | 17.5788 | 0.109643 | 0.0146233 | 0.107281 | 0.542318 | 1.777287 | 0.542318 | 0.443284 | 4.6847  | 1.45428 | 0.341388 | 0.480238 | 0.338166 | 2.79921 | 48.0568 | 36.2983 | 4.4478  | 2.1     | 1       | 1.6     | 0 |
| 0.0142441 | 0.0807199 | 10.2134 | 0.0813867 | 0.0546322 | 17.5788 | 0.109643 | 0.0146782 | 0.117287 | 0.542466 | 1.79745  | 0.542466 | 0.443284 | 4.6847  | 1.45428 | 0.341543 | 0.480238 | 0.338166 | 2.79921 | 48.0568 | 36.2983 | 4.4479  | 2.1     | 0.5     | 0       | 0 |
| 0.0142441 | 0.0807199 | 10.2134 | 0.0813867 | 0.0546322 | 17.5788 | 0.109643 | 0.0146782 | 0.117287 | 0.542466 | 1.79745  | 0.542466 | 0.443284 | 4.6847  | 1.45428 | 0.341543 | 0.480238 | 0.338166 | 2.79921 | 48.0568 | 36.2983 | 4.4479  | 2.1     | 0.5     | 0       | 0 |
| 0.0142441 | 0.0807199 | 10.2134 | 0.0813867 | 0.0546322 | 17.5788 | 0.109643 | 0.0146782 | 0.117287 | 0.542466 | 1.79745  | 0.542466 | 0.443284 | 4.6847  | 1.45428 | 0.341543 | 0.480238 | 0.338166 | 2.79921 | 48.0568 | 36.2983 | 4.4479  | 2.1     | 0.5     | 0       | 0 |
| 0.0220331 | 0.0807199 | 8.89021 | 0.120076  | 0.0869628 | 19.4999 | 0.192436 | 0.0257052 | 0.159382 | 0.142247 | 4.83852  | 0.910719 | 0.70536  | 6.28658 | 14.6314 | 0.30883  | 0.48524  | 0.341566 | 2.7992  | 48.357  | 39.5152 | 3.81976 | 3.1468  | 1.678   | 2.212   | 0 |
| 0.0220331 | 0.0807199 | 8.89021 | 0.120076  | 0.0869628 | 19.4999 | 0.192436 | 0.0257052 | 0.159382 | 0.142247 | 4.83852  | 0.910719 | 0.70536  | 6.28658 | 14.6314 | 0.30883  | 0.48524  | 0.341566 | 2.7992  | 48.357  | 39.5152 | 3.81976 | 3.04043 | 1.53217 | 2.04289 | 0 |
| 0.0220331 | 0.0807199 | 8.89021 | 0.120076  | 0.0869628 | 19.4999 | 0.192436 | 0.0257052 | 0.159382 | 0.142247 | 4.83852  | 0.910719 | 0.70536  | 6.28658 | 14.6314 | 0.30883  | 0.48524  | 0.341566 | 2.7992  | 48.357  | 39.5152 | 3.81976 | 3.04043 | 1.53217 | 2.04289 | 0 |
| 0.0152772 | 0.0982946 | 11.32   | 0.0318484 | 0.0253598 | 21.3486 | 0.189677 | 0.0326623 | 0.163953 | 0.515002 | 4.61827  | 0.995103 | 0.88605  | 5.38095 | 14.7297 | 0.314138 | 0.48405  | 0.340227 | 2.82893 | 51.6589 | 42.6677 | 3.58297 | 3.5     | 2       | 2       | 0 |
| 0.0152772 | 0.0982946 | 11.32   | 0.0318484 | 0.0253598 | 21.3486 | 0.189677 | 0.0326623 | 0.163953 | 0.515002 | 4.61827  | 0.995103 | 0.88605  | 5.38095 | 14.7297 | 0.314138 | 0.48405  | 0.340227 | 2.82893 | 51.6589 | 42.6677 | 3.58297 | 3.395   | 1.84    | 1.84    | 0 |
| 0.0152772 | 0.0982946 | 11.32   | 0.0318484 | 0.0253598 | 21.3486 | 0.189677 | 0.0326623 | 0.163953 | 0.515002 | 4.61827  | 0.995103 | 0.88605  | 5.38095 | 14.7297 | 0.314138 | 0.48405  | 0.340227 | 2.82893 | 51.6589 | 42.6677 | 3.58297 | 3.1025  | 2.07    | 2.07    | 0 |
| 0.0152772 | 0.0982946 | 11.32   | 0.0318484 | 0.0253598 | 21.3486 | 0.189677 | 0.0326623 | 0.163953 | 0.515002 | 4.61827  | 0.995103 | 0.88605  | 5.38095 | 14.7297 | 0.314138 | 0.48405  | 0.340227 | 2.82893 | 51.6589 | 42.6677 | 3.58297 | 3.51382 | 2.0079  | 2.0079  | 0 |
| 0.0150105 | 0.100931  | 7.0663  | 0.233986  | 0.143221  | 8.5083  | 0.200344 | 0.021296  | 0.202993 | 0.910987 | 18.0351  | 0.11141  | 0.10386  | 15.1248 | 1.53075 | 0.332264 | 0.493861 | 0.435258 | 2.7994  | 60.4551 | 48.7345 | 5.8809  | 3.6     | 1       | 1       | 0 |
| 0.0150105 | 0.100931  | 7.0663  | 0.233986  | 0.143221  | 8.5083  | 0.200344 | 0.021296  | 0.202993 | 0.910987 | 18.0351  | 0.11141  | 0.10386  | 15.1248 | 1.53075 | 0.332264 | 0.493861 | 0.435258 | 2.7994  | 60.4551 | 48.7345 | 5.8809  | 3.726   | 1.035   | 1.035   | 0 |
| 0.0150105 | 0.100931  | 7.0663  | 0.233986  | 0.143221  | 8.5083  | 0.200344 | 0.021296  | 0.202993 | 0.910987 | 18.0351  | 0.11141  | 0.10386  | 15.1248 | 1.53075 | 0.332264 | 0.493861 | 0.435258 | 2.7994  | 60.4551 | 48.7345 | 5.8809  | 3.726   | 1.035   | 1.035   | 0 |
| 0.0150105 | 0.100931  | 7.0663  | 0.233986  | 0.143221  | 8.5083  | 0.200344 | 0.021296  | 0.202993 | 0.910987 | 18.0351  | 0.11141  | 0.10386  | 15.1248 | 1.53075 | 0.332264 | 0.493861 | 0.435258 | 2.7994  | 60.4551 | 48.7345 | 5.8809  | 3.726   | 1.035   | 1.035   | 0 |
| 0.0180167 | 0.101099  | 7.11223 | 0.0460689 | 0.0468645 | 16.3237 | 0.195009 | 0.0263958 | 0.257851 | 0.33659  | 3.74514  | 0.798684 | 0.666765 | 4.38214 | 1.55699 | 0.310759 | 0.481215 | 0.337494 | 2.72014 | 41.1363 | 32.1712 | 3.48167 | 4.9     | 1.4     | 2.5     | 0 |
| 0.0180167 | 0.101099  | 7.11223 | 0.0460689 | 0.0468645 | 16.3237 | 0.195009 | 0.0263958 | 0.257851 | 0.33659  | 3.74514  | 0.798684 | 0.666765 | 4.38214 | 1.55699 | 0.310759 | 0.481215 | 0.337494 | 2.72014 | 41.1363 | 32.1712 | 3.48167 | 4       | 4       | 4       | 0 |
| 0.0180167 | 0.101099  | 7.11223 | 0.0460689 | 0.0468645 | 16.3237 | 0.195009 | 0.0263958 | 0.257851 | 0.33659  | 3.74514  | 0.798684 | 0.666765 | 4.38214 | 1.55699 | 0.310759 | 0.481215 | 0.337494 | 2.72014 | 41.1363 | 32.1712 | 3.48167 | 3       | 1.8     | 2.5     | 0 |
| 0.0180167 | 0.101099  | 7.11223 | 0.0460689 | 0.0468645 | 16.3237 | 0.195009 | 0.0263958 | 0.257851 | 0.33659  | 3.74514  | 0.798684 | 0.666765 | 4.38214 | 1.55699 | 0.310759 | 0.481215 | 0.337494 | 2.72014 | 41.1363 | 32.1712 | 3.48167 | 4.1     | 0       | 1       | 0 |
| 0.0180167 | 0.101099  | 7.11223 | 0.0460689 | 0.0468645 | 16.3237 | 0.195009 | 0.0263958 | 0.257851 | 0.33659  | 3.74514  | 0.798684 | 0.666765 | 4.38214 | 1.55699 | 0.310759 | 0.481215 | 0.337494 | 2.72014 | 41.1363 | 32.1712 | 3.48167 | 4.1     | 0       | 1       | 0 |
| 0.0180167 | 0.101099  | 7.11223 | 0.0460689 | 0.0468645 | 16.3237 | 0.195009 | 0.0263958 | 0.257851 | 0.33659  | 3.74514  | 0.798684 | 0.666765 | 4.38214 | 1.55699 | 0.310759 | 0.481215 | 0.337494 | 2.72014 | 41.1363 | 32.1712 | 3.48167 | 4.1     | 0       | 1       | 0 |
| 0.0180167 | 0.101099  | 7.11223 | 0.0460689 | 0.0468645 | 16.3237 | 0.195009 | 0.0263958 | 0.257851 | 0.33659  | 3.74514  | 0.798684 | 0.666765 | 4.38214 | 1.55699 | 0.310759 | 0.481215 | 0.337494 | 2.72014 | 41.1363 | 32.1712 | 3.48167 | 4.1     | 0       | 1       | 0 |
| 0.0180167 | 0.101099  | 7.11223 | 0.0460689 | 0.0468645 | 16.3237 | 0.195009 | 0.0263958 | 0.257851 | 0.33659  | 3.74514  | 0.798684 | 0.666765 | 4.38214 | 1.55699 | 0.310759 | 0.481215 | 0.337494 | 2.72014 | 41.1363 | 32.1712 | 3.48167 | 4.1     | 0       | 1       | 0 |
| 0.0180167 | 0.101099  | 7.11223 | 0.0460689 | 0.0468645 | 16.3237 | 0.195009 | 0.0263958 | 0.257851 | 0.33659  | 3.74514  | 0.798684 | 0.666765 | 4.38214 | 1.55699 | 0.310759 | 0.481215 | 0.337494 | 2.72014 | 41.1363 | 32.1712 | 3.48167 | 4.1     | 0       | 1       | 0 |
| 0.0180167 | 0.101099  | 7.11223 | 0.0460689 | 0.0468645 | 16.3237 | 0.195009 | 0.0263958 | 0.257851 | 0.33659  | 3.74514  | 0.798684 | 0.666765 | 4.38214 | 1.55699 | 0.310759 | 0.481215 | 0.337494 | 2.72014 | 41.1363 | 32.1712 | 3.48167 | 4.1     | 0       | 1       | 0 |
| 0.0180167 | 0.101099  | 7.11223 | 0.0460689 | 0.0468645 | 16.3237 | 0.195009 | 0.0263958 | 0.257851 | 0.33659  | 3.74514  | 0.798684 | 0.666765 | 4.38214 | 1.55699 | 0.310759 | 0.481215 | 0.337494 | 2.72014 | 41.1363 | 32.1712 | 3.48167 | 4.1     | 0       | 1       | 0 |
| 0.0180167 | 0.101099  | 7.11223 | 0.0460689 | 0.0468645 | 16.3237 | 0.195009 | 0.0263958 | 0.257851 | 0.33659  | 3.74514  | 0.798684 | 0.666765 | 4.38214 | 1.55699 | 0.310759 | 0.481215 | 0.337494 | 2.72014 | 41.1363 | 32.1712 | 3.48167 | 4.1     | 0       | 1       | 0 |
| 0.0180167 | 0.101099  | 7.11223 | 0.0460689 | 0.0468645 | 16.3237 | 0.195009 | 0.0263958 | 0.257851 | 0.33659  | 3.74514  | 0.798684 | 0.666765 | 4.38214 | 1.55699 | 0.310759 | 0.481215 | 0.337494 | 2.72014 | 41.1363 | 32.1712 | 3.48167 | 4.1     | 0       | 1       | 0 |
| 0.0180167 | 0.101099  | 7.11223 | 0.0460689 | 0.0468645 | 16.3237 | 0.195009 | 0.0263958 | 0.257851 | 0.33659  | 3.74514  | 0.798684 | 0.666765 | 4.38214 | 1.55699 | 0.310759 | 0.481215 | 0.337494 | 2.72014 | 41.1363 | 32.1712 | 3.48167 | 4.1     | 0       | 1       | 0 |
| 0.0180167 | 0.101099  | 7.11223 | 0.0460689 | 0.0468645 | 16.3237 | 0.195009 | 0.0263958 | 0.257851 | 0.33659  | 3.74514  | 0.798684 | 0.666765 | 4.38214 | 1.55699 | 0.310759 | 0.481215 | 0.337494 | 2.72014 | 41.1363 | 32.1712 | 3.48167 | 4.1     | 0       | 1       | 0 |
| 0.0180167 | 0.101099  | 7.11223 | 0.0460689 | 0.0468645 | 16.3237 | 0.195009 | 0.0263958 | 0.257851 | 0.33659  | 3.74514  | 0.798684 | 0.666765 | 4.38214 | 1.55699 | 0.310759 | 0.481215 | 0.337494 | 2.72014 | 41.1363 | 32.1712 | 3.48167 | 4.1     | 0       | 1       | 0 |
| 0.0180167 | 0.101099  | 7.11223 | 0.0460689 | 0.0468645 | 16.3237 | 0.195009 | 0.0263958 | 0.257851 | 0.33659  | 3.74514  | 0.798684 | 0.666765 | 4.38214 | 1.55699 | 0.310759 | 0.481215 | 0.337494 | 2.72014 | 41.1363 | 32.1712 | 3.48167 | 4.1     | 0       | 1       | 0 |
| 0.0180167 | 0.101099  | 7.11223 | 0.0460689 | 0.0468645 | 16.3237 | 0.195009 | 0.0263958 | 0.257851 | 0.33659  | 3.74514  | 0.798684 | 0.666765 | 4.38214 | 1.55699 | 0.310759 | 0.481215 | 0.337494 | 2.72014 | 41.1363 | 32.1712 | 3.48167 | 4.1     | 0       | 1       | 0 |
| 0.0180167 | 0.101099  | 7.11223 | 0.0460689 | 0.0468645 | 16.3237 | 0.195009 | 0.0263958 | 0.257851 | 0.33659  | 3.74514  | 0.798684 | 0.666765 | 4.38214 | 1.55699 | 0.310759 | 0.481215 | 0.337494 | 2.72014 | 41.1363 | 32.1712 | 3.48167 | 4.1     | 0       | 1       | 0 |
| 0.0180167 | 0.101099  | 7.11223 | 0.0460689 | 0.0468645 | 16.3237 | 0.195009 | 0.0263958 | 0.257851 | 0.33659  | 3.74514  | 0.798684 | 0.666765 | 4.38214 | 1.55699 | 0.310759 | 0.481    |          |         |         |         |         |         |         |         |   |
